# Supplementary material for: Construction of gold-siRNANPR1 nanoparticles for effective and quick silencing of NPR1 in Arabidopsis thaliana
Source: Royal Society of Chemistry journal article supplement (doi:10.1039/d0ra02156c), 2020-01-01
Supplement: d0ra02156c1.pdf [file d0ra02156c1.pdf]

## Supplemental Data

**Movie1:** After 1 hours of AuNPs-FAM-siRNA<sub>NPR1</sub> infiltration, the fluorescence in *Nicotiana benthamiana* leaves was observed by confocal microscope.

**Movie2:** After 1-2 hours of AuNPs-FAM-siRNA<sub>NPR1</sub> infiltration, the fluorescence in *Arabidopsis* protoplasts was observed by confocal microscope.

**Figure S1:** Estimation of FAM by laser confocal scanning microscope in *Nicotiana benthamiana* leaves.

Scanning 30 layers of *Nicotiana benthamiana* mesophyll cells from top to bottom, decompose the image of each layer. Images were taken under the excitation of 492nm wavelengths (green is the fluorescence of FAM). Bars = 5µm.

**Figure S2:** Protoplasts of *Arabidopsis* leaf epidermal cells 1 hour after injection by AuNPs-FAM-siRNA.

The green small spherical bright spots represented by the red arrow is AuNPs-FAM-siRNA. The blue arrow indicates the same position of these fluorescence in the bright field. Bars = 4µm.

**Figure S3:** The bacteria growth of plants inoculated with Pst DC3000 (*AvrRps4*) after different treatment for 3 days.

Columns 1: *npr1* infiltrated with buffer solution grew the most colonies (the colonies grew in the third row or even the fifth row)

Columns 2: the growth of colonies in the leaves of Col-0 plants infiltrated with AuNPs-siRNA<sub>NPR1</sub> (no colonies in the third row, but many colonies in the second row)

Column 3: Col-0 infiltrated with buffer solution had the least colony growth (only a few colonies in the second row)

**Table S1:** Statistics of colonies after different treatments

Counted the number of colonies with corresponding dilution on the solid medium, and then calculated the total number of colonies by the following formula:

$$\text{Colony-Forming Units (cfu) /leaf disc} = ((\text{colonies} * 10^{\text{dilution}} / 10) * 500) / 2$$

**Table S2:** Zeta potential detected in this study.

**Table S3:** Particle sizes detected in this study.

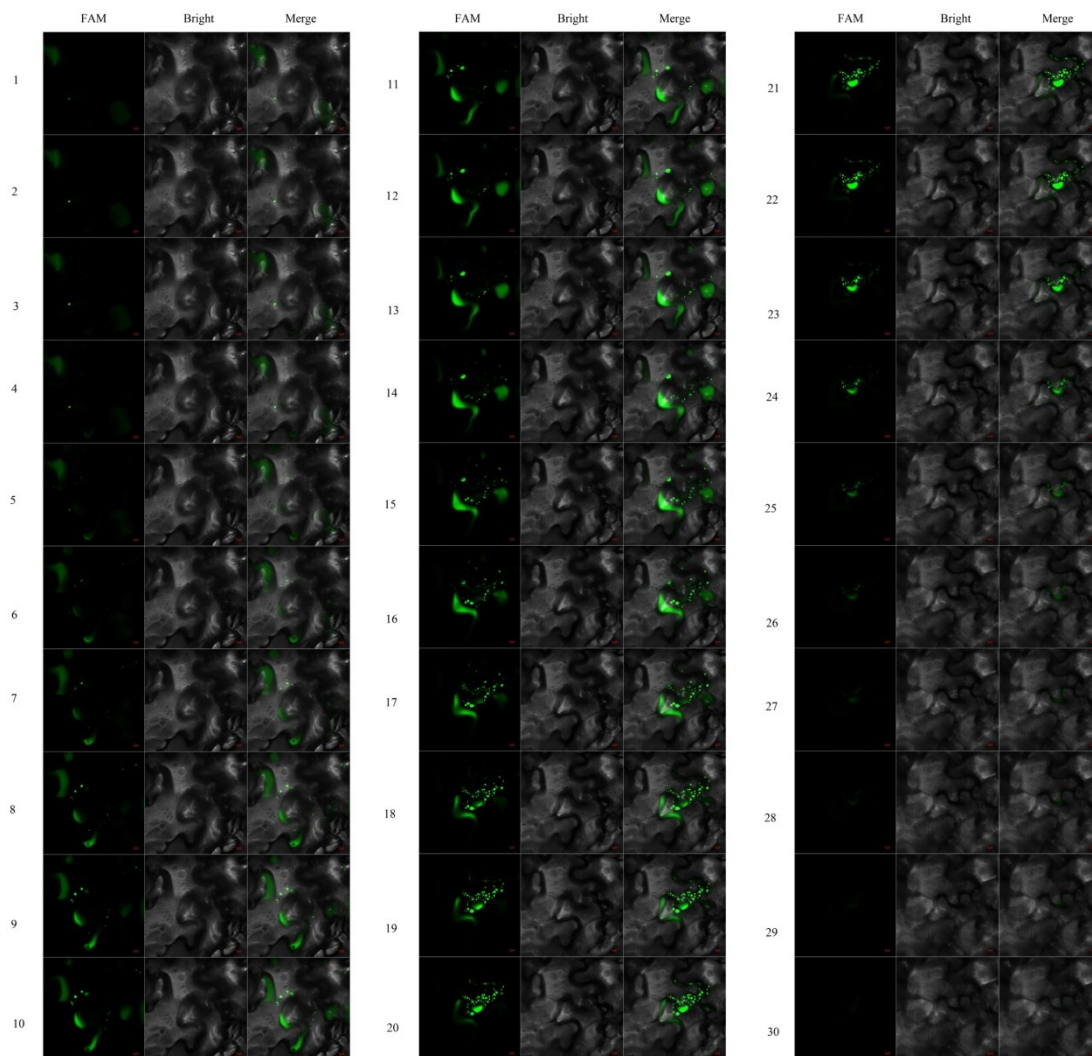

Figure S1

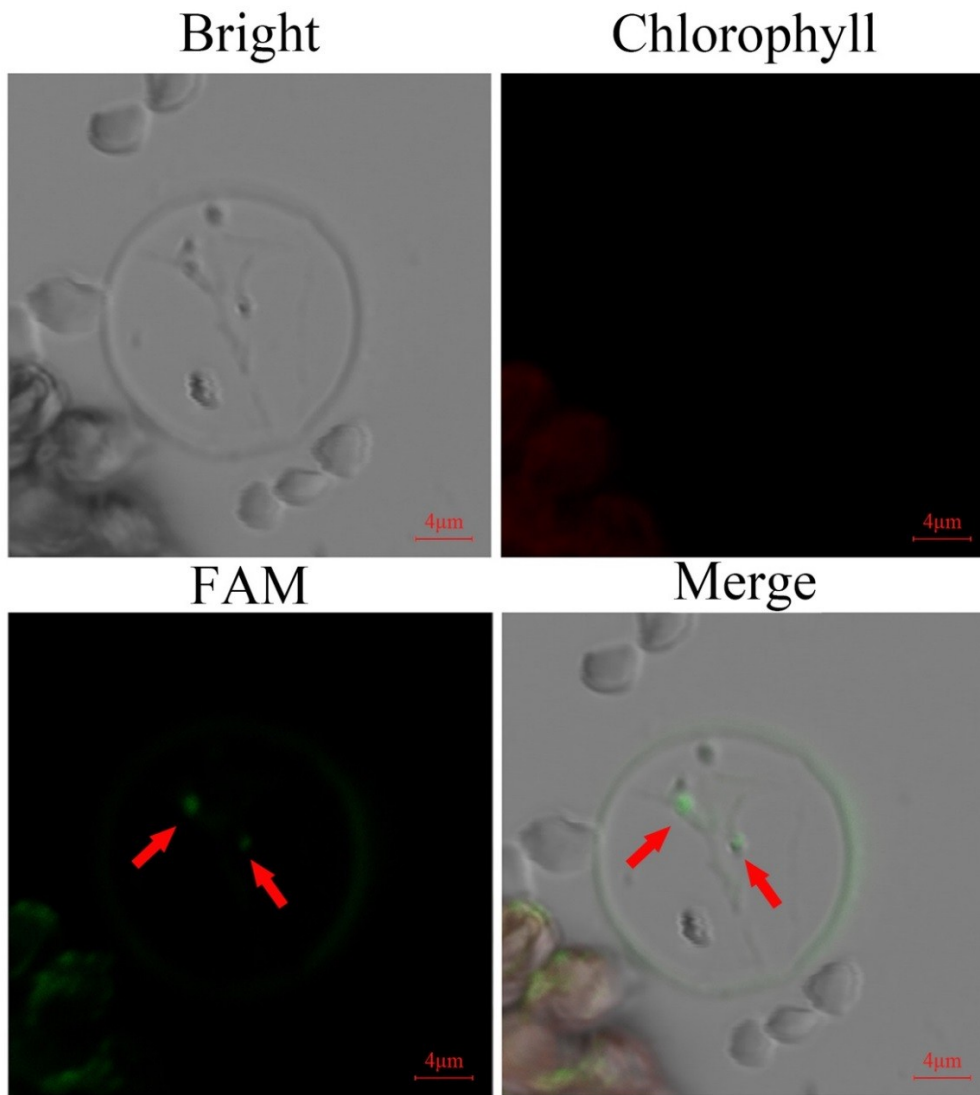

Figure S2

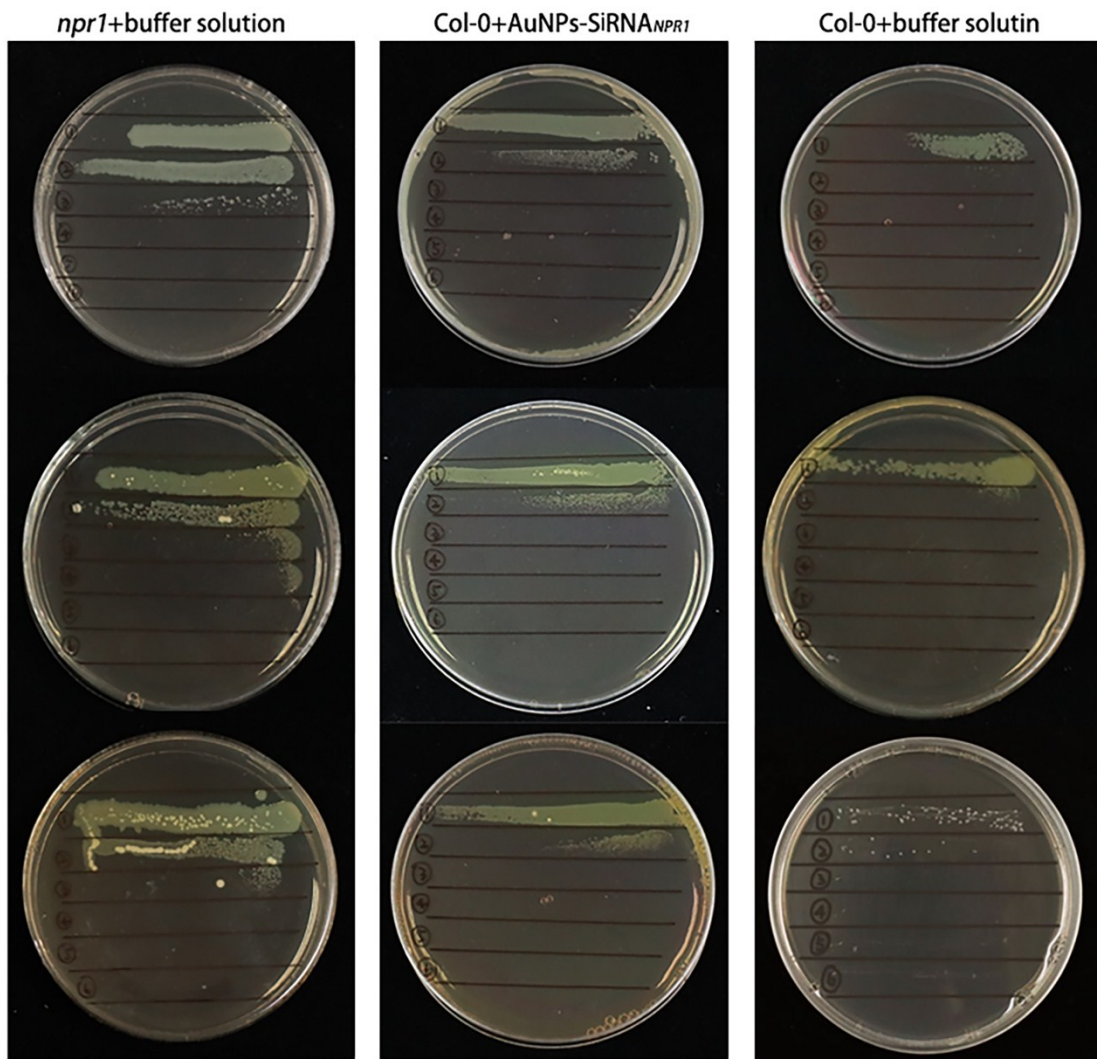

Figure S3

Table S1: Statistics of colonies after different treatments

| Genotype                           | plant | colonies | dilution | cfu/leaf disc | log(cfu) | ave log |
|------------------------------------|-------|----------|----------|---------------|----------|---------|
| <i>npr1</i> + buffer solution      | 1     | 87       | 3        | 2175000       | 6.3375   | 6.5549  |
|                                    | 2     | 5        | 5        | 12500000      | 7.0969   |         |
|                                    | 3     | 68       | 3        | 1700000       | 6.2304   |         |
| Col + SiRNA <sub><i>NPR1</i></sub> | 1     | 214      | 2        | 535000        | 5.7284   | 5.7251  |
|                                    | 2     | 237      | 2        | 592500        | 5.7727   |         |
|                                    | 3     | 189      | 2        | 472500        | 5.6744   |         |
| Col + buffer solution              | 1     | 14       | 2        | 35000         | 4.5441   | 4.6484  |
|                                    | 2     | 31       | 2        | 77500         | 4.8893   |         |
|                                    | 3     | 13       | 2        | 32500         | 4.5119   |         |

Table S2: Zeta potential detected in this study

| Type          | Sample Name | T<br>° C | ZP<br>mV | Mob<br>µmcm/Vs | Cond<br>mS/cm |
|---------------|-------------|----------|----------|----------------|---------------|
| Zeta          | AU          | 25       | 25.4     | 1.988          | 0.00876       |
| Zeta          | AU          | 25       | 25.2     | 1.974          | 0.00922       |
| Zeta          | AU          | 25       | 26.8     | 2.098          | 0.0168        |
| Zeta          | Au+siRNA    | 25       | 3.14     | 0.01961        | 0.000477      |
| Zeta          | Au+siRNA    | 25       | 3.69     | 0.289          | 0.000366      |
| Zeta          | Au+siRNA    | 25       | 5.48     | 0.4294         | 0.00172       |
| Mean Au       |             | 25.8     |          |                |               |
| Std Dev       |             | 18.38    |          |                |               |
| Mean Au+siRNA |             | 4.10333  |          |                |               |
| Std Dev       |             | 1.22353  |          |                |               |

Table S3: Particle sizes detected in this study

| Type          | Sample Name | T<br>° C | Z-Ave<br>d_nm | PdI   | Mean Count Rate<br>kcps | Derived Count Rate<br>kcps | Intercept | Pk1 Mean Size<br>d_nm | Pk2 Mean Size<br>d_nm | Pk3 Mean Size<br>d_nm |  |
|---------------|-------------|----------|---------------|-------|-------------------------|----------------------------|-----------|-----------------------|-----------------------|-----------------------|--|
| Size          | Au          | 25       | 34.02         | 0.305 | 228.3                   | 2056.7                     | 0.91      | 49.27                 | 4169                  | 0                     |  |
| Size          | Au          | 25       | 33.52         | 0.303 | 224.3                   | 2020.6                     | 0.91      | 50.46                 | 4306                  | 0                     |  |
| Size          | Au          | 25       | 34.22         | 0.398 | 240.1                   | 2163.4                     | 0.908     | 49.02                 | 4429                  | 0                     |  |
| Size          | Au+SiRNA    | 25       | 37.6          | 0.526 | 332.3                   | 2993.6                     | 0.907     | 52.65                 | 1018                  | 3554                  |  |
| Size          | Au+SiRNA    | 25       | 38.79         | 0.55  | 362.5                   | 3265.9                     | 0.901     | 75.51                 | 3673                  | 0                     |  |
| Size          | Au+SiRNA    | 25       | 38.36         | 0.423 | 348.2                   | 3137                       | 0.905     | 200.5                 | 0                     | 0                     |  |
| Mean Au       |             | 33.92    |               |       |                         |                            |           |                       |                       |                       |  |
| Std Dev       |             | 0.36056  |               |       |                         |                            |           |                       |                       |                       |  |
| Mean Au+SiRNA |             | 38.25    |               |       |                         |                            |           |                       |                       |                       |  |
| Std Dev       |             | 0.60258  |               |       |                         |                            |           |                       |                       |                       |  |
